# Supplementary material for: A band-to-band transition visible-light-responsive anatase titania photocatalyst by N,F-codoping for water splitting and CO2 reduction
Source: Royal Society of Chemistry journal article supplement (doi:10.1039/d2ta08076a), 2022-11-25
Supplement: d2ta08076a1.pdf [file d2ta08076a1.pdf]

## Supplementary Information

### **Band-to-band transition visible-light-responsive anatase titania photocatalyst by N,F-codoping for water splitting and CO<sub>2</sub> reduction**

Juhong Lian<sup>a#</sup>, Kengo Shibata<sup>b#</sup>, Yejun Xiao<sup>c#</sup>, Shiwen Du<sup>a</sup>, Toshiya Tanaka<sup>b</sup>, Yu Qi<sup>a</sup>, Osamu Ishitani,<sup>b</sup> Kazuhiko Maeda<sup>b\*</sup>, Zhaochi, Feng<sup>a</sup>, Fuxiang Zhang<sup>a,\*</sup>

<sup>a</sup> State Key Laboratory of Catalysis, *iChEM*, Dalian Institute of Chemical Physics, Chinese Academy of Sciences, Dalian National Laboratory for Clean Energy, Dalian 116023, Liaoning, China.

<sup>b</sup> Department of Chemistry, School of Science, Tokyo Institute of Technology, 2-12-1-NE-2 Ookayama, Meguro-ku, Tokyo 152-8550, Japan.

<sup>c</sup> State Key Laboratory of Molecular Reaction Dynamics and Dynamics Research Center for Energy and Environmental Materials, Dalian Institute of Chemical Physics, Chinese Academy of Sciences, Dalian 116023, Liaoning, China.

<sup>#</sup> the authors equally contribute to this work

## Characterization

XRD measurements were carried out using a Rigaku D/Max-2500/PC powder diffractometer (Cu K $\alpha$  radiation) with an operating voltage of 40 kV and current of 200 mA. The scan range and scan rate were 10-60° and 5 °/min, respectively. Ultraviolet-visible absorption spectra over the range of 200-800 nm were recorded on a UV-vis spectrophotometer (V-670, JASCO). Surface morphologies of the samples were imaged by a field emission scanning electron microscopy (FESEM, S-5500, Hitachi). Energy dispersive spectrometer (EDS, max800) elemental analysis was used to study the distribution of constituent elements in the synthesized materials. The surface elemental binding energies were recorded on an X-ray photoelectron spectrometer (XPS, Thermo Esclab 250Xi, monochromatic Al K $\alpha$  X-ray source). The C1s peak (284.6 eV) was referenced to normalize the measured binding energies for each sample. Transient absorption spectroscopy was conducted with a homemade spectrometer as the previous description<sup>1</sup>. Specifically, an amplified Ti: sapphire laser system from Coherent (800 nm, 35 fs, 6 mJ/pulse, and 1 kHz repetition rate), nonlinear frequency mixing techniques and Femto-TA 100 spectrometer (Time-Tech Spectra) were used. For transient absorption spectroscopy, a pump pulse at 400 nm was used to excite the sample, and the induced absorption change ( $\Delta A$ ) as functions of wavelength was recorded.

## First-principle calculations

All the calculations were performed using the Vienna Ab-initio Simulation Package (VASP)<sup>2, 3</sup> with projector augmented wave (PAW) method<sup>4</sup> based on the density functional theory. The generalized gradient approximation (GGA)<sup>5</sup> of Perdew-Burke-Ernzerhof (PBE) form<sup>6</sup> was applied to describe the exchange-correlation functional with an energy cutoff of 500 eV. The valence electron configuration including Ti (3s<sup>2</sup>3p<sup>6</sup>3d<sup>2</sup>4s<sup>2</sup>), O (2s<sup>2</sup>2p<sup>4</sup>), N (2s<sup>2</sup>2p<sup>3</sup>), and F (2s<sup>2</sup>2p<sup>5</sup>) were considered in the present work<sup>7</sup>. According to the Monkhorst-Pack scheme<sup>8</sup>, the gamma-centered k-point mesh of the Brillouin zone sampling for the primitive cells of bulk TiO<sub>2</sub> was set at 7 × 7 × 3. To investigate the effect of N,F-doping on the electronic structure of TiO<sub>2</sub>,

the  $\text{TiO}_2$  (101) surface structure model with four-layer periodic structure (containing 32 O atoms and 16 Ti atoms) was established, and then substituted by N atoms, F-connecting with Ti atoms of the surface based on the fully optimized anatase  $\text{TiO}_2$  unit cell.. Thus the N,F-codoped  $\text{TiO}_2$  (101) structure model has been established (containing 28 O atoms, 16 Ti atoms, 4 N atoms and 2 F atoms). The k-point mesh of the Brillouin zone was set at  $3 \times 7 \times 1$  for the two models, and the vacuum layer is set to 15 Å. The geometries were fully optimized, and the convergence threshold was set to be  $10^{-6}$  eV in energy and  $0.01 \text{ eV Å}^{-1}$  in force. The PBE +  $U$  approach was employed to accurately describe the electronic structure with Ti 3d electron states with a  $U$ - $J$  value of 4.5 eV according to the previous report<sup>9</sup>.

## Supplementary data

**Chart 1** Structure and abbreviation of Ru complex used in this work.

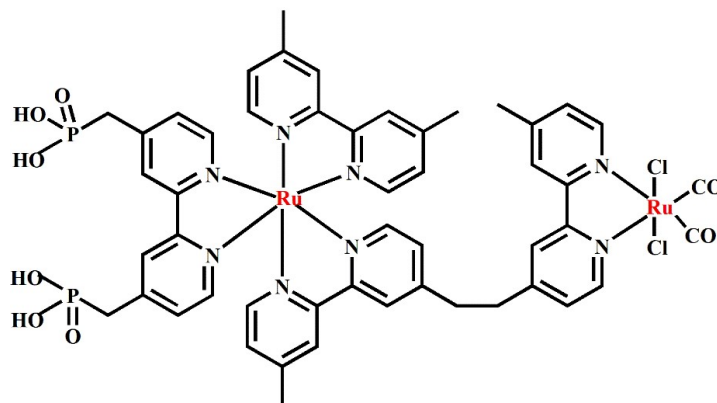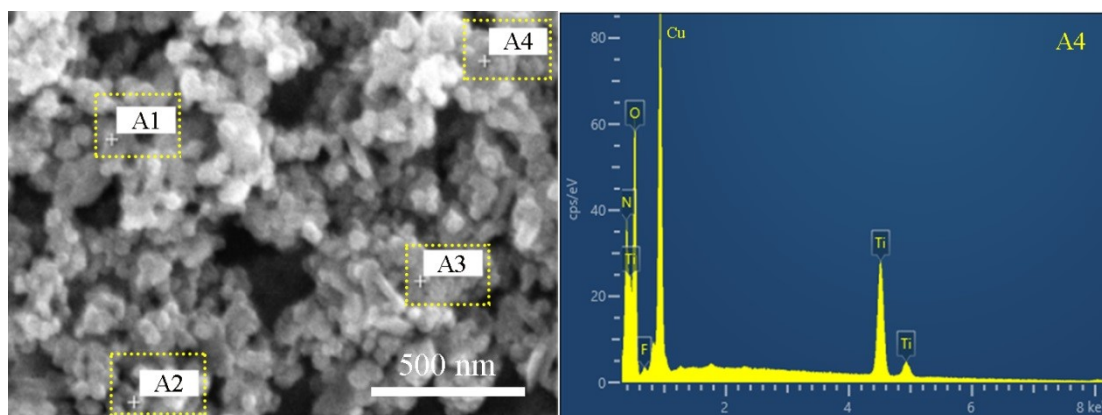

**Fig. S1** SEM image of TNOF-0 sample and the selected regions for EDS analysis.

**Table S1** Ti, O, N, F elements content in different selected regions (Fig. S1) of TNOF-0 sample.

| Area | Ti (wt%) | O (wt%) | N (wt%) | F (wt%) |
|------|----------|---------|---------|---------|
| A1   | 46.59    | 47.43   | 4.86    | 1.13    |
| A2   | 49.20    | 44.77   | 5.09    | 0.94    |
| A3   | 47.26    | 42.83   | 5.05    | 1.06    |
| A4   | 51.9     | 42.83   | 4.39    | 0.89    |

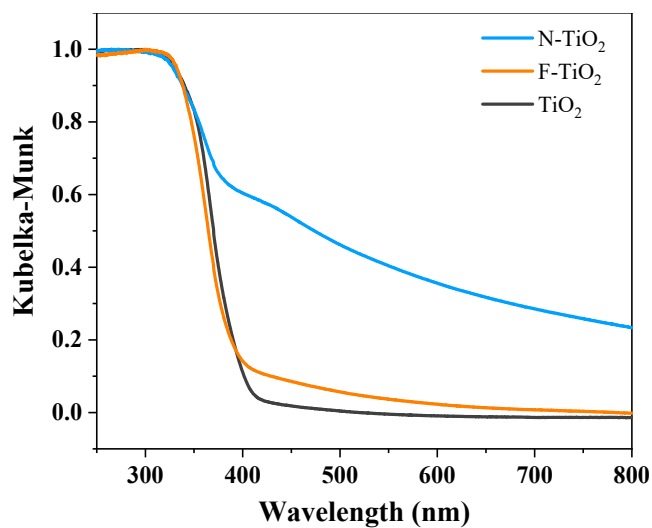

**Fig. S2** UV-vis spectra of TiO<sub>2</sub>, N-TiO<sub>2</sub>, and F-TiO<sub>2</sub> samples.

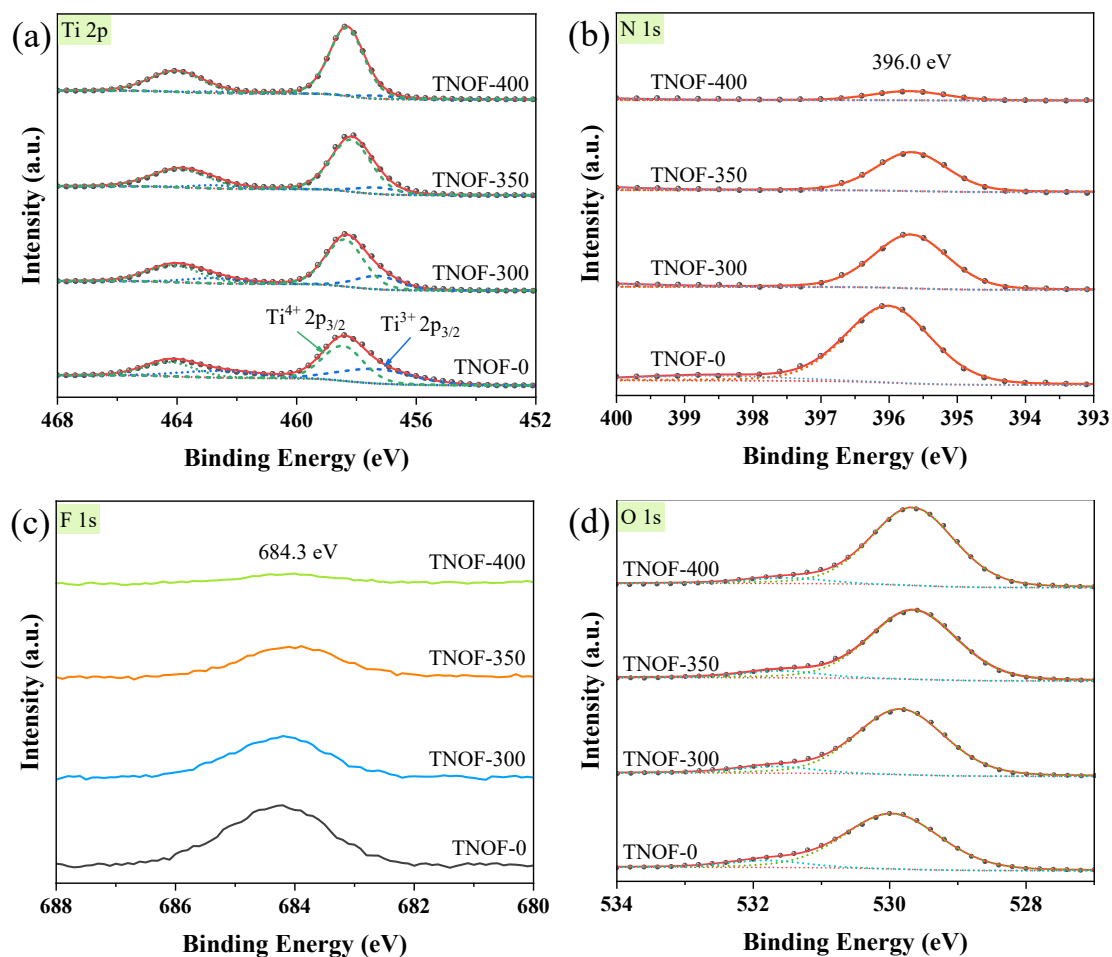

**Fig. S3** XPS spectra of (a) Ti 2p, (b) N 1s, (c) F 1s, and (d) O 1s for TNOF samples obtained at different temperatures.

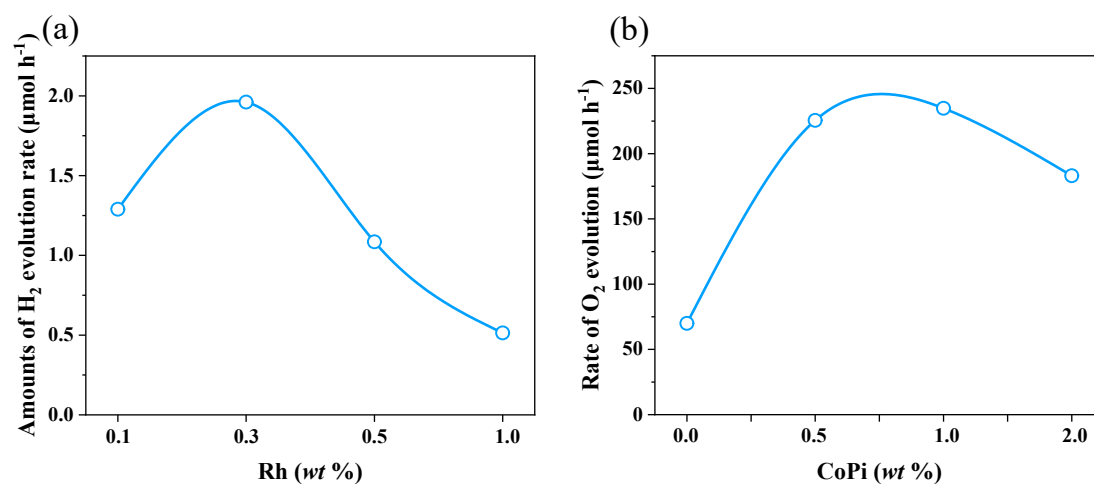

**Fig. S4** (a) Optimization of Rh cocatalyst with TNOF-400, (b) Optimization of CoPi cocatalyst with TNOF-350. H<sub>2</sub> evolution reaction conditions: 150 mg catalyst, 100 mL 10 vol% triethanolamine aqueous solution; O<sub>2</sub> evolution reaction conditions: 100 mg photocatalysts, 150 mg La<sub>2</sub>O<sub>3</sub>, 150 mL 10 mM AgNO<sub>3</sub> aqueous solution. Pyrex top irradiation type, 300 W xenon lamp ( $\lambda > 420$  nm).

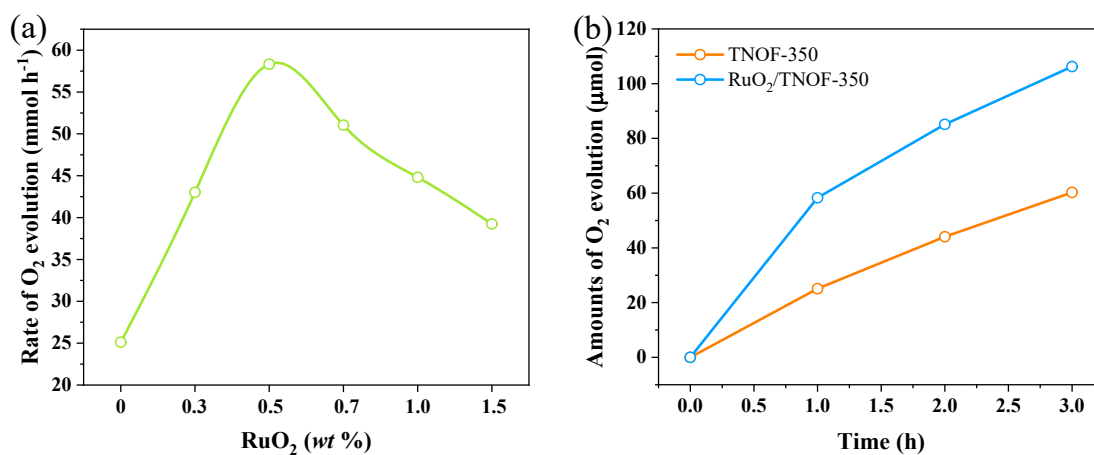

**Fig. S5** (a) Optimization of RuO<sub>2</sub> cocatalyst with TNOF-350 and (b) time course curve of the photocatalytic O<sub>2</sub> evolution on TNOF-350 and 0.5 wt%-RuO<sub>2</sub>/TNOF-350. Reaction conditions: 100 mg catalyst; 100 mL 5 mM Fe(NO<sub>3</sub>)<sub>3</sub> aqueous solution; 300 W Xe lamp ( $\lambda > 420$  nm).

**Table S2** The photocatalytic activities of water reduction and/or oxidation over other reported N,X-codoped ( $X = \text{F}, \text{B}, \text{or C}$ )  $\text{TiO}_2$  photocatalysts.

| Sample                             | Bandgap | Band-to-band transition | Light source                                    | cocatalyst | Reaction solution                                      | HER/OER activity ( $\mu\text{mol/h}$ ) | ref                                                       |
|------------------------------------|---------|-------------------------|-------------------------------------------------|------------|--------------------------------------------------------|----------------------------------------|-----------------------------------------------------------|
| TNOF                               | 2.16    | yes                     | 300 W Xe lamp<br>( $\lambda > 420 \text{ nm}$ ) | Rh         | triethanolamine/ $\text{H}_2\text{O}$<br>(10 vol%)     | 2.9                                    | <b>This work</b>                                          |
|                                    |         |                         |                                                 | —          | $\text{AgNO}_3$ (10 mM)                                | 69.9                                   |                                                           |
|                                    |         |                         |                                                 | CoPi       |                                                        | 234.8                                  |                                                           |
| $\text{TiN}_x\text{O}_y\text{F}_z$ | 2.34    | yes                     | 300 W Xe lamp<br>( $\lambda > 450 \text{ nm}$ ) | Pt         | $\text{CH}_3\text{OH}/\text{H}_2\text{O}$<br>(10 vol%) | 0.1                                    | <i>J. Phys. Chem. C</i> , <b>2007</b> , 111, 18264-18270  |
|                                    |         |                         | 300 W Xe lamp<br>( $\lambda > 400 \text{ nm}$ ) | —          | $\text{AgNO}_3$ (10 mM)                                | 43.0                                   |                                                           |
| TiOFN                              | 2.20    | yes                     | 300 W Xe lamp<br>( $\lambda > 420 \text{ nm}$ ) | —          | —                                                      | —                                      | <i>Chem. Commun.</i> , <b>2011</b> , 47, 11742-11744      |
|                                    |         |                         |                                                 | —          | $\text{AgNO}_3$ (10 mM)                                | 50.0                                   |                                                           |
| R- $\text{TiO}_2\text{:N,F}$       | 2.20    | yes                     | 300 W Xe lamp<br>( $\lambda > 420 \text{ nm}$ ) | —          | —                                                      | —                                      | <i>Sustain. Energy Fuels</i> , <b>2018</b> , 2, 2025-2035 |
|                                    |         |                         |                                                 | —          | $\text{AgNO}_3$ (10 mM)                                | 11.5                                   |                                                           |

|                                      |      |     |                               |                  |                                                  |      |                                                           |
|--------------------------------------|------|-----|-------------------------------|------------------|--------------------------------------------------|------|-----------------------------------------------------------|
| B <sub>3</sub> N-TiO <sub>2</sub>    | 1.97 | yes | 300 W Xe lamp<br>(λ > 420 nm) | Pt               | CH <sub>3</sub> OH/H <sub>2</sub> O (10<br>vol%) | 0.69 | <i>Chem. Eur. J.</i> ,<br><b>2019</b> , 25, 1787-<br>1794 |
|                                      |      |     |                               | —                | AgNO <sub>3</sub> (10 mM)                        | 3.60 |                                                           |
|                                      |      |     |                               | RuO <sub>2</sub> |                                                  | 8.16 |                                                           |
| TiO <sub>2-x</sub> (CN) <sub>y</sub> | 2.48 | yes | 300 W Xe lamp<br>(λ > 420 nm) | —                | —                                                | —    | <i>Adv. Funct.</i>                                        |
|                                      |      |     |                               | CoO <sub>x</sub> | AgNO <sub>3</sub> (20 mM)                        | 4.25 | <i>Mater.</i> , <b>2019</b> , 29,<br>1901943              |

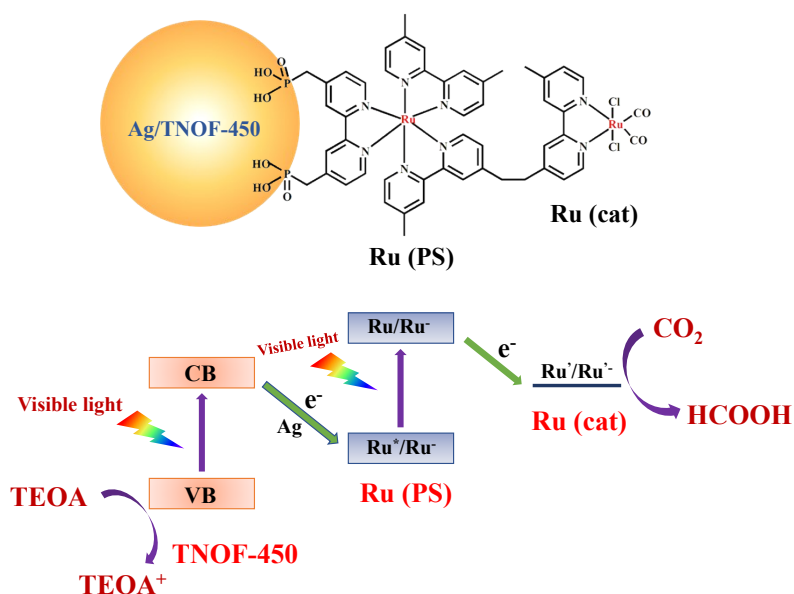

**Fig. S6** The Z-scheme CO<sub>2</sub> reduction system consisting of Ag/TNOF-450 and **RuRu'** under visible-light ( $\lambda > 400$  nm).

Under visible-light irradiation, both the TNOF-450 and the photosensitizer in **RuRu'** were excited simultaneously. The excited electrons in the conduction band of TNOF-450 can transfer to the excited photosensitizer unit, producing one-electron-reduced species of photosensitizer, from which the intramolecular electron transfer to the catalytic unit in **RuRu'**, and followed by reduction of CO<sub>2</sub> into HCOOH. In this work, the photocatalytic CO<sub>2</sub> reduction was performed using the as-prepared **RuRu'**/Ag/TNOF-450 catalyst under visible-light, where Ag can transfer the electrons from TNOF-450 to the photosensitizer in **RuRu'**.

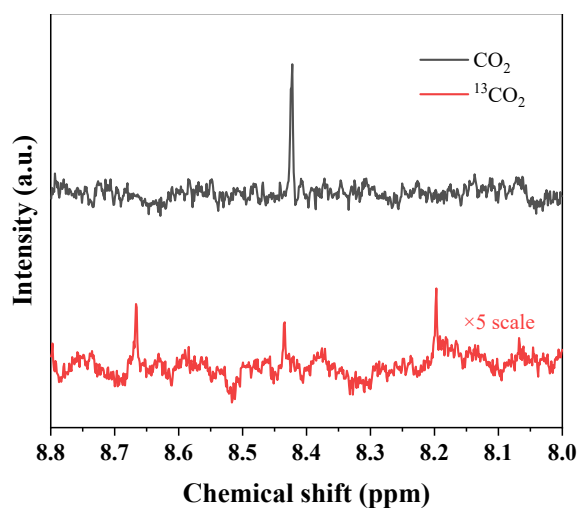

**Fig. S7**  $^1\text{H}$  NMR spectra of a reactant solution (2 mL of MeCN/TEOA mixed solution) containing 10 mg of **RuRu'**/Ag/TNOF-450, measured after filtration. The photocatalyst suspension was irradiated at 370–500 nm ( $\lambda_{\text{max}} = 410$  and 460 nm) using a merry-go-round-type apparatus with an LED light for 15 h under  $^{13}\text{CO}_2$  (650 Torr) or saturated unlabeled  $\text{CO}_2$ .

**Table S3** Comparison of the activities of TNOF-450 photocatalyst with other photocatalysts for CO<sub>2</sub> reduction.

| Sample                   | Reaction condition and time                             | Light source                             | Product                                                                                              | HCOOH production (μmol) | TON <sub>(HCOOH)</sub> | Selectivity <sub>(HCOOH)</sub> | ref                                                       |
|--------------------------|---------------------------------------------------------|------------------------------------------|------------------------------------------------------------------------------------------------------|-------------------------|------------------------|--------------------------------|-----------------------------------------------------------|
| <b>RuRu'/Ag/TNOF-450</b> | saturated CO <sub>2</sub> , MeCN/TEOA (4:1, 4 mL), 15 h | 400 W high pressure Hg lamp (λ > 400 nm) | HCOOH, H <sub>2</sub>                                                                                | 2.6 ± 0.2               | 2.2 × 10 <sup>2</sup>  | 97.2%                          | <b>This work</b>                                          |
| N-TiO <sub>2</sub>       | CO <sub>2</sub> (g), H <sub>2</sub> O (g)               | 300 W Xe lamp (λ > 400 nm)               | CH <sub>3</sub> OH                                                                                   | —                       | —                      | —                              | <i>Chinese J. Catal.</i> , <b>2015</b> , 36, 2127-2134    |
| Nb-TiO <sub>2</sub>      | CO <sub>2</sub> (g) flow                                | 30 W white bulbs                         | CH <sub>4</sub> , CO                                                                                 | 0.0                     | 0.0                    | —                              | <i>J. Colloid Interf. Sci.</i> , <b>2019</b> , 540, 1-8   |
| N-TiO <sub>2</sub>       | CO <sub>2</sub> (g) + H <sub>2</sub> O (g) (30 : 1)     | Xe lamp (315 < λ < 600 nm)               | H <sub>2</sub> , CH <sub>4</sub> , CO, C <sub>2</sub> H <sub>6</sub> , C <sub>3</sub> H <sub>8</sub> | —                       | —                      | —                              | <i>Catal. Sci. Technol.</i> , <b>2020</b> , 10, 1688-1698 |
| N-TiO <sub>2</sub>       | CO <sub>2</sub> (g) + H <sub>2</sub> O                  | 13 W fluorescent                         | H <sub>2</sub> , CH <sub>4</sub> , C <sub>2</sub> H <sub>4</sub> ,                                   | —                       | —                      | —                              | <i>Appl. Catal. B-</i>                                    |

|                                                                                 |                                                                 |                                                |                               |        |                         |         |                                                                   |
|---------------------------------------------------------------------------------|-----------------------------------------------------------------|------------------------------------------------|-------------------------------|--------|-------------------------|---------|-------------------------------------------------------------------|
|                                                                                 | (g)                                                             | integrated bulbs,<br>6h                        | C <sub>2</sub> H <sub>6</sub> |        |                         |         | <i>Environ.</i> , <b>2015</b> ,<br>168-169, 114-<br>124           |
| N-TiO <sub>2</sub> /CuO                                                         | saturated CO <sub>2</sub> ,<br>H <sub>2</sub> O                 | 20 W Xe lamp<br>(350 < λ < 800<br>nm)          | H <sub>2</sub> , HCOOH        | 1.65   | —                       | ~ 94.5% | <i>J. Photochem.<br/>Photobiol.</i> , <b>2022</b> ,<br>11, 100125 |
| <b>Ru'</b> /mpg-C <sub>3</sub> N <sub>4</sub>                                   | saturated CO <sub>2</sub> ,<br>MeCN/TEOA<br>(4:1, 4 mL), 5 h    | 450 W Xe lamp<br>(λ > 400 nm)                  | H <sub>2</sub> , CO, HCOOH    | 19.345 | > 200                   | >80%    | <i>Chem. Commun.</i> ,<br><b>2013</b> , 49, 10127-<br>10129       |
| <b>RuRu'</b> /Ag/g-C <sub>3</sub> N <sub>4</sub>                                | saturated CO <sub>2</sub><br>(g), DMA/TEOA<br>(4:1, 4 mL), 40 h | 400 W high<br>pressure Hg lamp<br>(λ > 400 nm) | HCOOH, CO, H <sub>2</sub>     | ~ 67   | > 3.3 × 10 <sup>4</sup> | 87-99%  | <i>J. Am. Chem.<br/>Soc.</i> , <b>2016</b> , 138,<br>5159-5170    |
| <b>RuRu'</b> /Pb <sub>2</sub> Ti <sub>2</sub> O <sub>5.4</sub> F <sub>1.2</sub> | saturated CO <sub>2</sub> ,<br>MeCN/TEOA<br>(4:1, 4 mL), 15 h   | 400 W high<br>pressure Hg lamp<br>(λ > 400 nm) | HCOOH, H <sub>2</sub>         | 0.6    | 26                      | > 99%   | <i>J. Am. Chem.<br/>Soc.</i> , <b>2018</b> , 140,<br>6648-6655    |

## References

1. Q. Sun, Z. Yin, S. Wang, C. Zhao, J. Leng, W. Tian and S. Jin, *J Phys Chem Lett*, 2020, **11**, 9045-9050.
2. G. Kresse and J. Furthmüller, *Physical Review B*, 1996, **54**, 11169-11186.
3. G. Kresse and D. Joubert, *Physical Review B*, 1999, **59**, 1758-1775.
4. P. E. Blöchl, *Physical Review B*, 1994, **50**, 17953-17979.
5. J. P. Perdew, J. A. Chevary, S. H. Vosko, K. A. Jackson, M. R. Pederson, D. J. Singh and C. Fiolhais, *Physical Review B*, 1992, **46**, 6671-6687.
6. J. P. Perdew, K. Burke and M. Ernzerhof, *Physical Review Letters*, 1996, **77**, 3865-3868.
7. A. Miyoshi, A. Kuwabara and K. Maeda, *Inorganic Chemistry*, 2021, **60**, 2381-2389.
8. H. J. Monkhorst and J. D. Pack, *Physical Review B*, 1976, **13**, 5188-5192.
9. M. Nolan, A. Iwaszuk, A. K. Lucid, J. J. Carey and M. Fronzi, *Advanced Materials*, 2016, **28**, 5425-5446.
